# Supplementary material for: Chemerin Is a Novel Adipocyte-Derived Factor Inducing Insulin Resistance in Primary Human Skeletal Muscle Cells
Source: PubMed Central journal article supplement — Diabetes. 2009 Aug 31;58(12):2731–40. doi: 10.2337/db09-0277 (PMC2780878; doi:10.2337/db09-0277), 2009-08-31
Supplement: supp_db09-0277_0277Supplementary_table.pdf [file supp_db09-0277_0277Supplementary_table.pdf]

### Supplementary table

|                          | Lean (n=27) | Obese (n=26)  |
|--------------------------|-------------|---------------|
| Age, years               | 34.5 ± 1.6  | 36.1 ± 1.5    |
| BMI                      | 22.7 ± 0.3  | 37.0 ± 0.9*   |
| Waist-Hip-Ratio          | 0.85 ± 0.01 | 0.95 ± 0.01*  |
| Glucose, mmol/l          | 4.75 ± 0.08 | 5.12 ± 0.10*  |
| Insulin, mU/l            | 4.47 ± 0.31 | 11.86 ± 1.28* |
| HOMA                     | 0.95 ± 0.07 | 2.78 ± 0.33*  |
| Cholesterin, mmol/l      | 4.42 ± 0.16 | 4.50 ± 0.11   |
| HDL- Cholesterin, mmol/l | 1.66 ± 0.06 | 1.05 ± 0.04*  |
| Triglycerides, mmol/l    | 0.89 ± 0.09 | 0.95 ± 0.06   |
| Systolic BP, mmHg        | 118 ± 2     | 118 ± 2       |
| Diastolic BP, mmHg       | 70 ± 1      | 75 ± 1*       |

Clinical data of fat explant donors. \*significantly different from lean subjects
